# Supplementary material
Source: HighWire-hosted journal article supplement (https://www.cmaj.ca/highwire/filestream/75464/field_highwire_adjunct_files/1/190999-res-2-at.pdf)
Supplement: 190999-res-2-at.pdf [file 190999-res-2-at.pdf]

## Appendix 2

**Supplemental Figure 1:** Visual representation of median, 25<sup>th</sup> and 75<sup>th</sup> percentiles of time to death, with censoring at five years

| <b>FEMALE</b>                         |                                        | <b>Age</b>   | <b>MALE</b>                             |                                         |
|---------------------------------------|----------------------------------------|--------------|-----------------------------------------|-----------------------------------------|
| >5 years<br>(>5 years - >5 years)     | >5 years<br>(2.17 years - >5 years)    |              | <b>65-69</b>                            | >5 years<br>(4.30 years - >5 years)     |
| >5 years<br>(4.93 years - >5 years)   | 4.81 years<br>(2.16 years - >5 years)  | <b>70-74</b> | >5 years<br>(3.56 years - >5 years)     | 4.18 years<br>(1.67 years - >5 years)   |
| >5 years<br>(3.99 years - >5 years)   | 4.56 years<br>(1.93 years - >5 years)  | <b>75-79</b> | >5 years<br>(2.79 years - >5 years)     | 3.49 years<br>(1.36 years - >5 years)   |
| >5 years<br>(3.23 years - >5 years)   | 3.72 years<br>(1.67 years - >5 years)  | <b>80-84</b> | 4.33 years<br>(2.19 years - >5 years)   | 2.68 years<br>(0.96 years - >5 years)   |
| 4.68 years<br>(2.42 years - >5 years) | 2.98 years<br>(1.07 years - >5 years)  | <b>85-89</b> | 3.26 years<br>(1.46 years - >5 years)   | 2.07 years<br>(0.70 years - 4.07 years) |
| 3.07 years<br>(1.39 years - >5 years) | 1.90 years<br>(0.65 years - 3.87years) | <b>90+</b>   | 2.11 years<br>(0.80 years - 4.02 years) | 1.29 years<br>(0.37 years - 2.87 years) |

Format: median survival (75% survival - 25% survival)

|                      |                      |
|----------------------|----------------------|
| <b>NO</b>            | <b>YES</b>           |
| <b>Organ Failure</b> | <b>Organ Failure</b> |

**Supplemental Figure 2:** Cumulative incidence curves for admission to a long-term care home

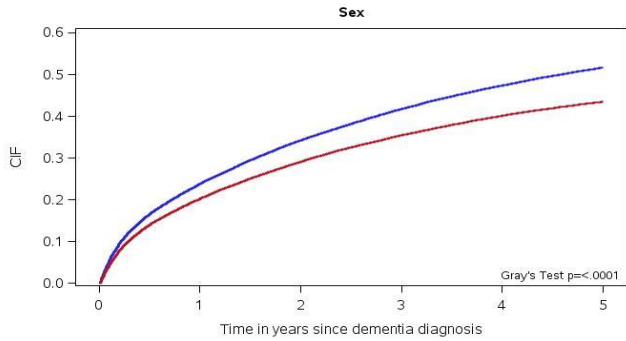

|        | Currently Event-Free |       |       |       |       |       |
|--------|----------------------|-------|-------|-------|-------|-------|
| Female | 65095                | 43475 | 33767 | 26324 | 20624 | 16178 |
| Male   | 43662                | 28710 | 21980 | 16939 | 13242 | 10362 |

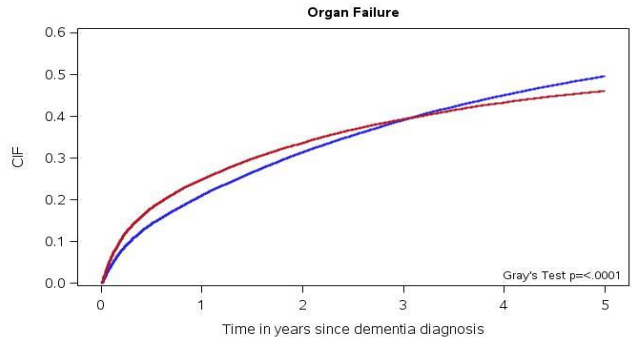

|     | Currently Event-Free |       |       |       |       |       |
|-----|----------------------|-------|-------|-------|-------|-------|
| No  | 71963                | 50748 | 40349 | 32045 | 25616 | 20426 |
| Yes | 37394                | 21437 | 15398 | 11218 | 8250  | 6114  |

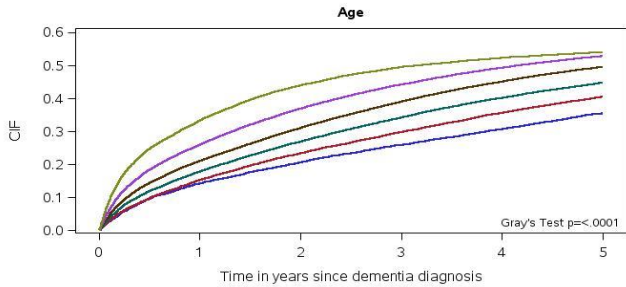

|       | Currently Event-Free |       |       |       |      |      |
|-------|----------------------|-------|-------|-------|------|------|
| 65-69 | 5340                 | 4729  | 4132  | 3644  | 3227 | 2907 |
| 70-74 | 11069                | 8674  | 7349  | 6295  | 5314 | 4504 |
| 75-79 | 20457                | 15157 | 12420 | 10155 | 8269 | 6774 |
| 80-84 | 28934                | 19950 | 15549 | 11988 | 9094 | 6916 |
| 85-89 | 26825                | 16333 | 11779 | 8465  | 6085 | 4320 |
| 90+   | 16472                | 7343  | 4518  | 2846  | 1878 | 1219 |

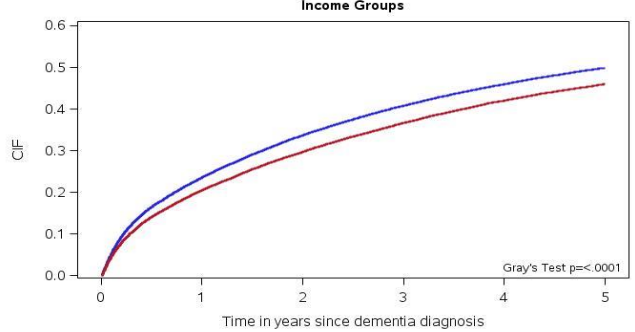

|       | Currently Event-Free |       |       |       |       |       |
|-------|----------------------|-------|-------|-------|-------|-------|
| Q1-Q3 | 67019                | 43557 | 33245 | 25685 | 19981 | 15602 |
| Q4-Q5 | 41738                | 28628 | 22502 | 17578 | 13885 | 10938 |

**Supplemental Figure 3:** Visual representation of median, 25th percentile and 75th percentile of time to admission to a long-term care home, estimated from cumulative incidence function accounting for competing risk of death, with censoring at five years

| <b>FEMALE</b>                         |                                       | <b>Age</b>   | <b>MALE</b>                         |                                     |
|---------------------------------------|---------------------------------------|--------------|-------------------------------------|-------------------------------------|
| >5 years<br>(2.86 years - >5 years)   | >5 years<br>(1.74 years - >5 years)   |              | <b>65-69</b>                        | >5 years<br>(2.98 years - >5 years) |
| >5 years<br>(2.44 years - >5 years)   | >5 years<br>(1.36 years - >5 years)   | <b>70-74</b> | >5 years<br>(2.53 years - >5 years) | >5 years<br>(1.75 years - >5 years) |
| >5 years<br>(1.76 years - >5 years)   | >5 years<br>(1.32 years - >5 years)   | <b>75-79</b> | >5 years<br>(1.98 years - >5 years) | >5 years<br>(1.71 years - >5 years) |
| 4.36 years<br>(1.37 years - >5 years) | 4.88 years<br>(1.06 years - >5 years) | <b>80-84</b> | >5 years<br>(1.61 years - >5 years) | >5 years<br>(1.37 years - >5 years) |
| 3.30 years<br>(0.88 years - >5 years) | 4.34 years<br>(0.76 years - >5 years) | <b>85-89</b> | >5 years<br>(1.15 years - >5 years) | >5 years<br>(0.99 years - >5 years) |
| 2.31 years<br>(0.47 years - >5 years) | 3.30 years<br>(0.44 years - >5 years) | <b>90+</b>   | >5 years<br>(0.71 years - >5 years) | >5 years<br>(0.67 years - >5 years) |

Format: Median admitted (25% admitted - 75% admitted)

Format: Median admitted (25% admitted - 75% admitted)

**NO YES**  
**Organ Failure**

**NO YES**  
**Organ Failure**
